# Supplementary material for: An iron-doped cobalt phosphide nano-electrocatalyst derived from a metal–organic framework for efficient water splitting
Source: Royal Society of Chemistry journal article supplement (doi:10.1039/c9dt03619a), 2019-01-01
Supplement: c9dt03619a1.pdf [file c9dt03619a1.pdf]

## Supporting Information

### **Iron-doped Cobalt Phosphide Nano-Electrocatalyst Derived from Metal-Organic Framework for Efficient Water Splitting**

Can Lin<sup>a</sup>, Pengyan Wang<sup>a</sup>, Huihui Jin<sup>a</sup>, Jiahuan Zhao<sup>a</sup>, Ding Chen<sup>a</sup>, Suli Liu<sup>b,\*</sup>,  
Chengtian Zhang<sup>a</sup>, Shichun Mu<sup>a,\*</sup>

*<sup>a</sup>State Key Laboratory of Advanced Technology for Materials Synthesis and Processing, Wuhan  
University of Technology, Wuhan 430070, China*

*<sup>b</sup>Key Laboratory of Advanced Functional Materials of Nanjing, Nanjing Xiaozhuang University,  
Nanjing 211171, China*

*\*Corresponding author: E-mail: [msc@whut.edu.cn](mailto:msc@whut.edu.cn), [niuniu\\_410@126.com](mailto:niuniu_410@126.com)*

**Materials:** Cobalt chloride hexahydrate ( $\text{CoCl}_2 \cdot 6\text{H}_2\text{O}$ , Aladdin), Iron (III) nitrate nonahydrate ( $\text{Fe}(\text{NO}_3)_3 \cdot 9\text{H}_2\text{O}$ , Aladdin), 2-methylimidazole ( $\text{C}_4\text{H}_6\text{N}_2$ , Aladdin), sodium hypophosphite ( $\text{NaH}_2\text{PO}_2 \cdot \text{H}_2\text{O}$ , Aladdin), ethanol (Aladdin), Nafion (Sigma-Aldrich),  $\text{IrO}_2$  (Sigma-Aldrich). All reagents are purchased from commercial companies without further treatment. Deionized water acts as solvent in the experiment.

**Electrochemical Measurements:** OER and HER tests were carried out at room temperature with an electrochemical workstation (CHI660E, Shanghai, China) with a standard three-electrode system. Comprising a graphite rod as the counter electrode, a saturated Hg/HgO as the reference electrode, and Ni foam coated with catalyst as working electrode. To prepare the working electrode, the as-prepared electrocatalyst (5 mg) and Nafion (20  $\mu\text{L}$ , 5 wt%) were scattered in 980  $\mu\text{L}$  isopropanol-water solution (volume ratio of isopropanol to water is 9:1) and then mixture was ultrasonicated for 1 h to form homogeneous ink. The well-mixed ink was used to coat and cover Ni foam surface to achieve a mass loading of 3  $\text{mg cm}^{-2}$ . For comparison,  $\text{IrO}_2$  ink was prepared by the same method. Ni foam substrate was thoroughly cleaned with 0.5 M  $\text{H}_2\text{SO}_4$  (15 min), absolute ethanol (20 min) and finally rinsed with deionized water (20 min) in an ultrasound bath. Polarization curves were obtained at room temperature with a scan rate of 5  $\text{mV s}^{-1}$  in 1.0 M KOH. All potentials were transformed to the reversible hydrogen electrode (RHE) by following the equation:  $E(\text{RHE}) = E(\text{Hg/HgO}) + 0.059 \text{ pH} + 0.098 \text{ V}$ . The overpotential ( $\eta$ ) of OER was calculated by the formula ( $\eta(\text{V}) = E(\text{RHE}) - 1.23 \text{ V}$ ) and the overpotential ( $\eta$ ) of HER was calculated by the following formula ( $\eta(\text{V}) = -E(\text{RHE})$ ). The obtained polarization curves were iR-compensated. Tafel plots were

fitted according to the formula ( $\eta = b \log j + a$ ), where  $\eta$  is the overpotential,  $j$  represents the current density,  $a$  and  $b$  represent constant and Tafel slope, respectively. Electrochemical impedance spectroscopy (EIS) was performed at open circuit potential with the frequency range of  $10^{-1}$  Hz to  $10^5$  Hz. The double layer capacitance ( $C_{dl}$ ) was determined by cyclic voltammetry curves measured by scan rates of 80, 100, 120, 140 and 160  $\text{mV s}^{-1}$ .

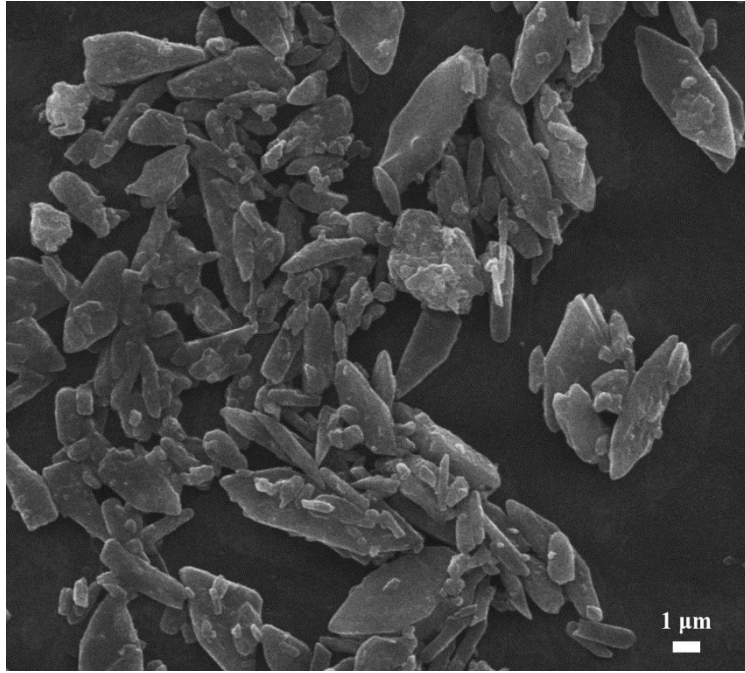

**Figure S1.** SEM image of Fe<sub>0.27</sub>Co<sub>0.73</sub> precursor

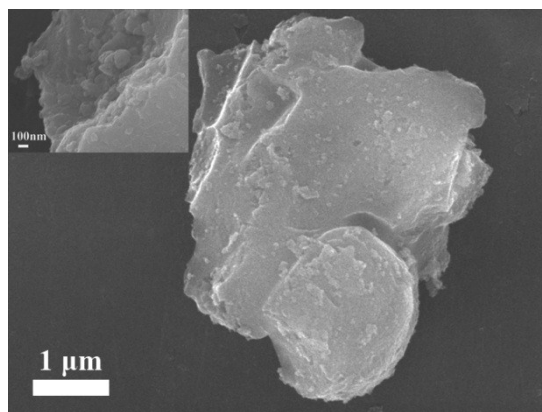

**Figure S2.** SEM images of  $\text{Fe}_{0.27}\text{Co}_{0.73}$  precursor that was calcined in nitrogen without adding phosphorus source.

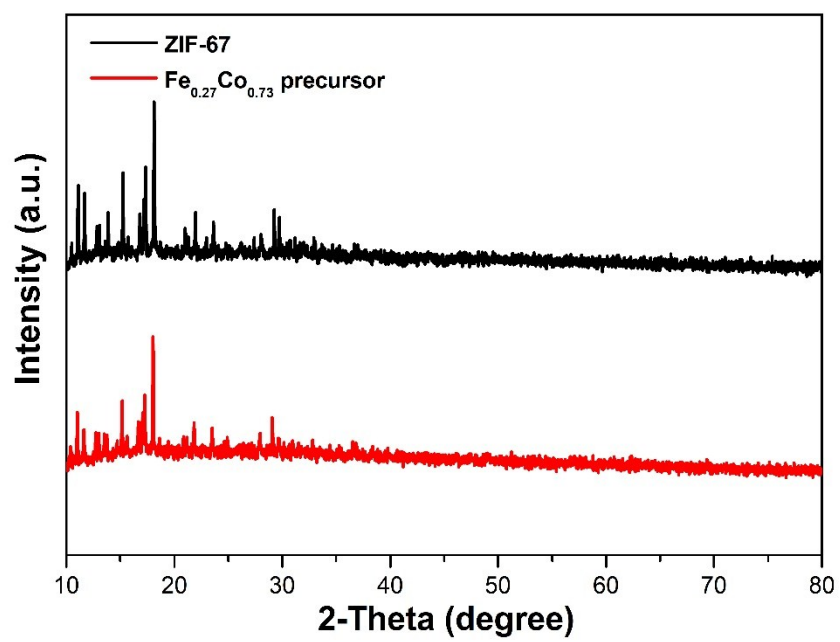

**Figure S3.** XRD patterns of ZIF-67 and Fe<sub>0.27</sub>Co<sub>0.73</sub> precursor

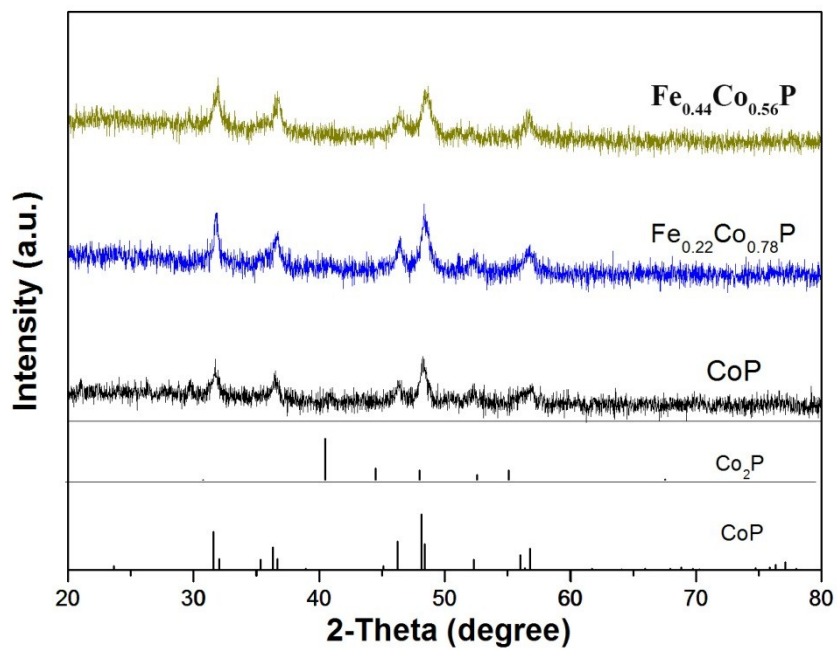

**Figure S4.** XRD patterns of  $\text{Fe}_{0.22}\text{Co}_{0.78}\text{P}$ ,  $\text{Fe}_{0.44}\text{Co}_{0.56}\text{P}$ ,  $\text{CoP}$ .

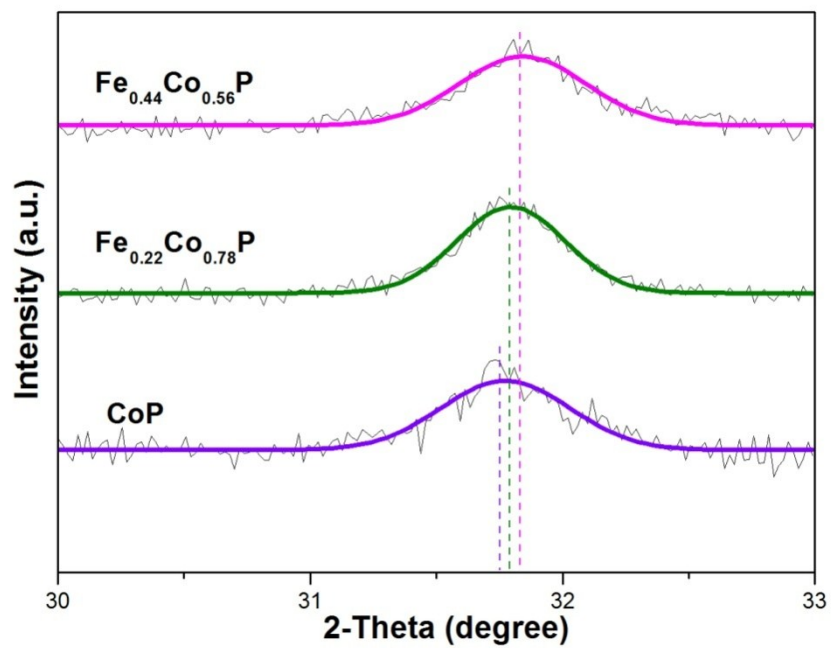

**Figure S5.** XRD patterns for a slow scan of 1 degree per minute for a specific diffraction angle including  $\text{CoP}$ ,  $\text{Fe}_{0.22}\text{Co}_{0.78}\text{P}$  and  $\text{Fe}_{0.44}\text{Co}_{0.56}\text{P}$ .



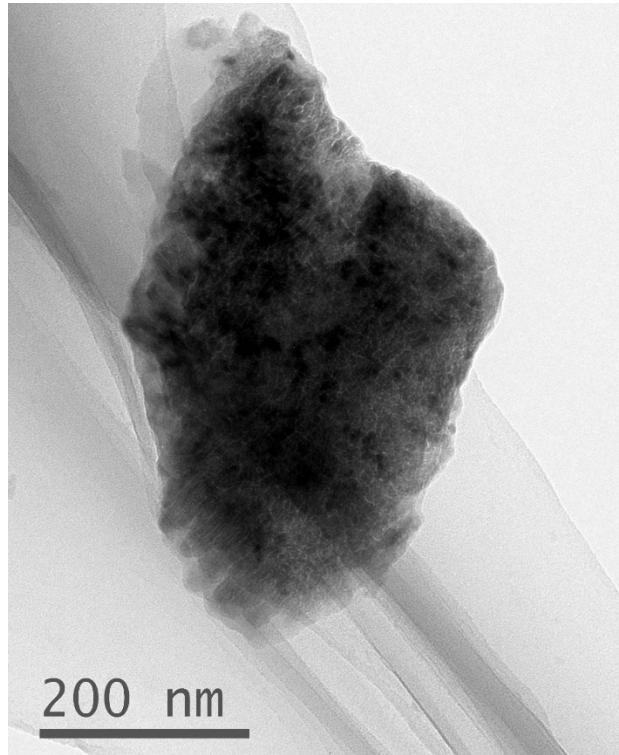

**Figure S6.** Low-resolution TEM image of Fe<sub>0.27</sub>Co<sub>0.73</sub>P

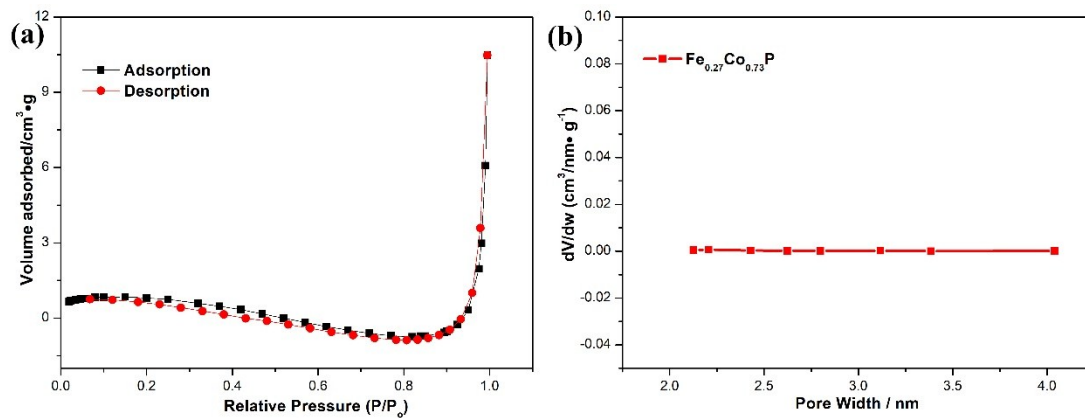

Figure S7. (a) N<sub>2</sub> adsorption-desorption isotherms and (b) pore size distributions of Fe<sub>0.27</sub>Co<sub>0.73</sub>P.

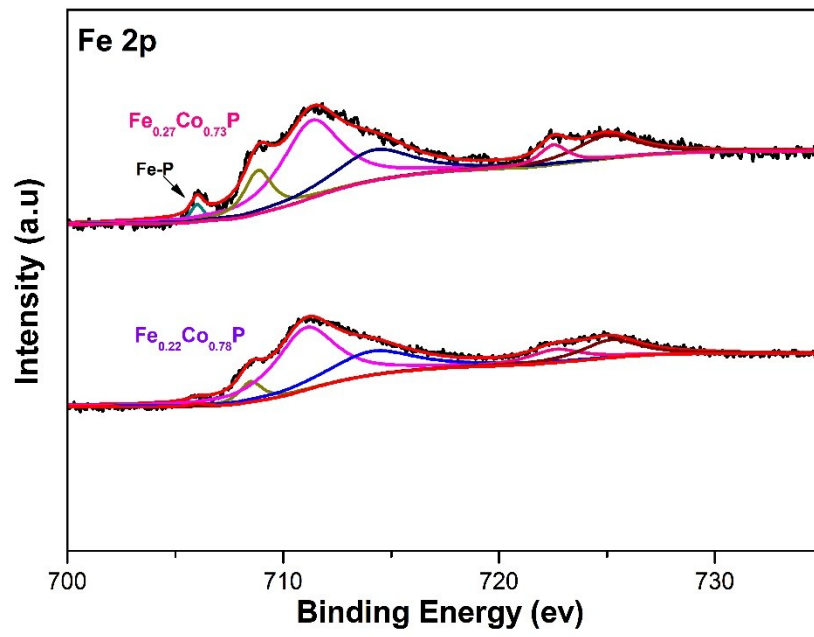

**Figure S8.** XPS spectrum of  $\text{Fe}_{0.27}\text{Co}_{0.73}\text{P}$  and  $\text{Fe}_{0.22}\text{Co}_{0.78}\text{P}$  in Fe 2p region.

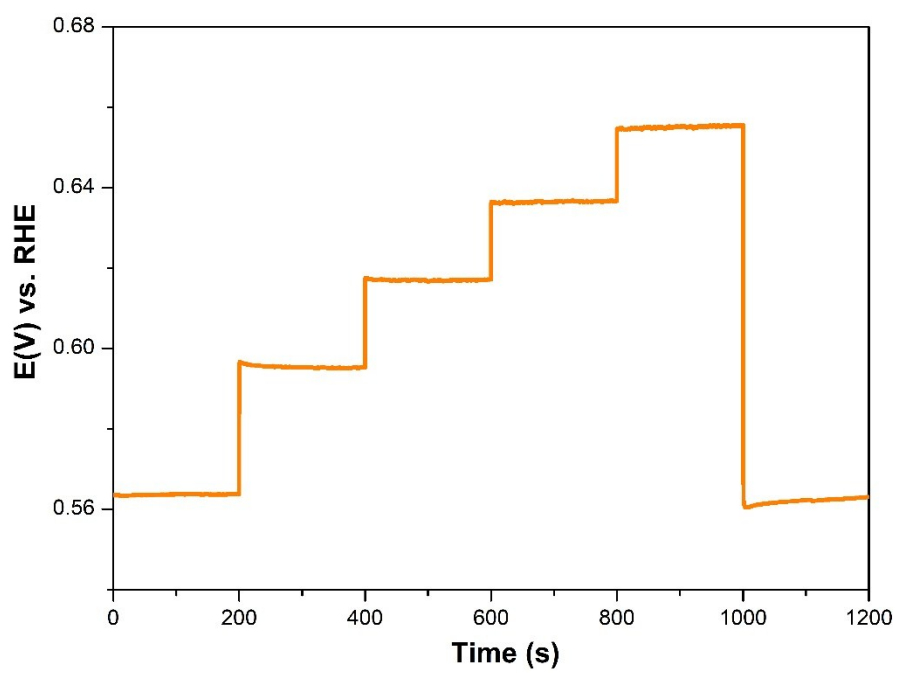

**Figure S9.** Multi-step current curve for  $\text{Fe}_{0.27}\text{Co}_{0.73}\text{P/NF}$  without iR correction.

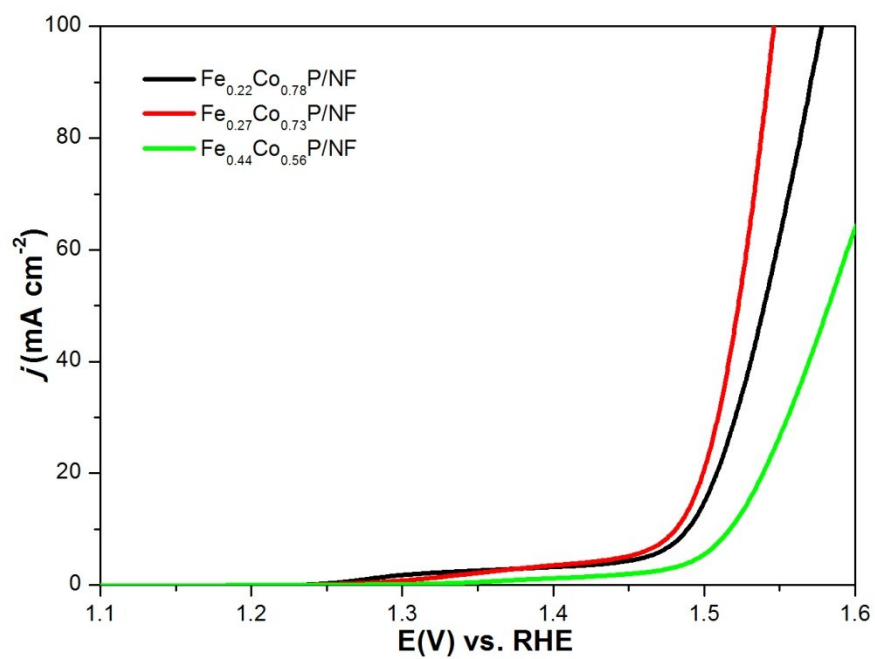

**Figure S10.** Polarization curves of  $\text{Fe}_{0.27}\text{Co}_{0.73}\text{P/NF}$ ,  $\text{Fe}_{0.22}\text{Co}_{0.78}\text{P/NF}$  and  $\text{Fe}_{0.44}\text{Co}_{0.56}\text{P/NF}$ .

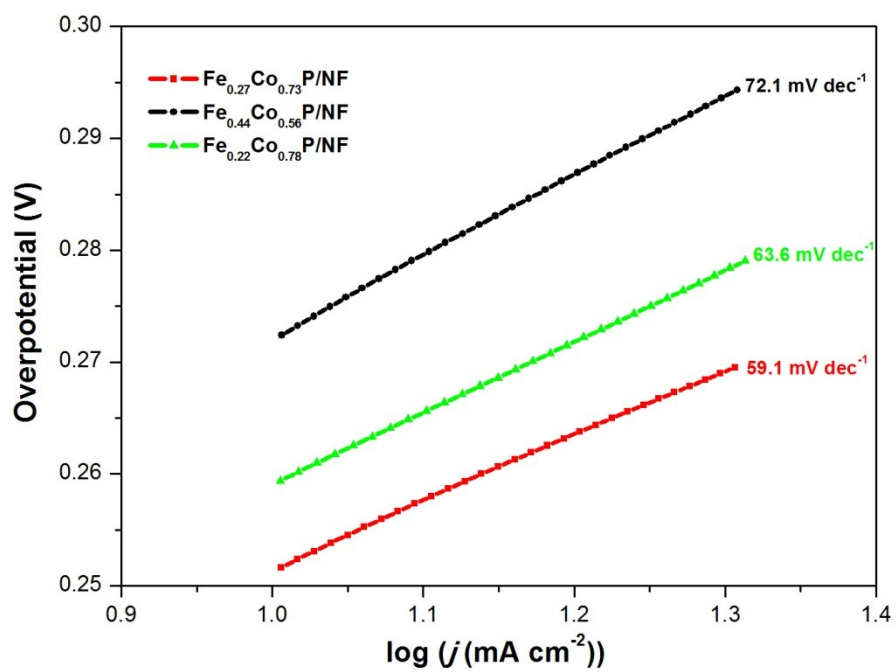

**Figure S11.** Tafel slopes of  $\text{Fe}_{0.27}\text{Co}_{0.73}\text{P/NF}$ ,  $\text{Fe}_{0.22}\text{Co}_{0.78}\text{P/NF}$  and  $\text{Fe}_{0.44}\text{Co}_{0.56}\text{P/NF}$ .

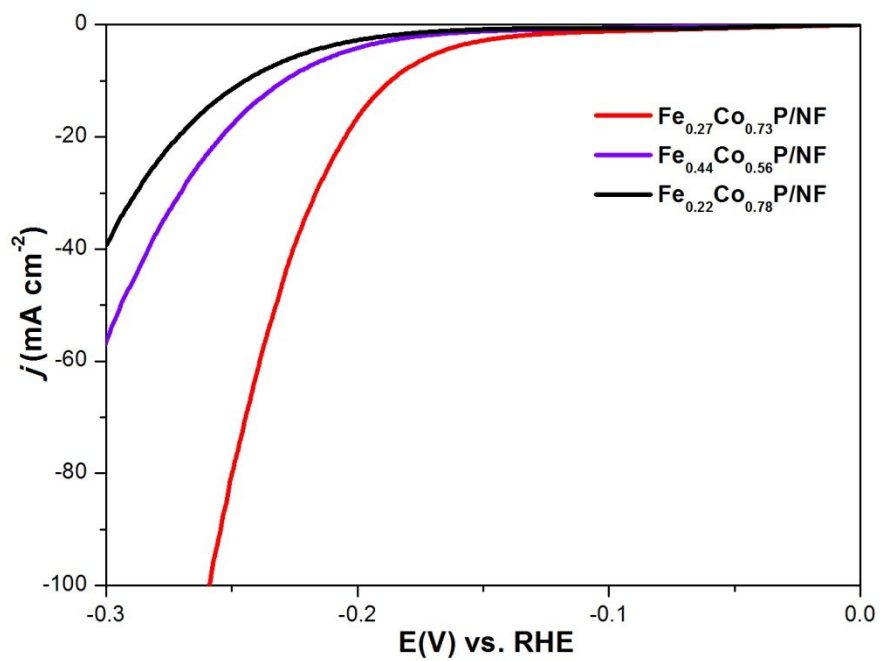

**Figure S12.** Polarization curves of  $\text{Fe}_{0.27}\text{Co}_{0.73}\text{P/NF}$ ,  $\text{Fe}_{0.22}\text{Co}_{0.78}\text{P/NF}$  and  $\text{Fe}_{0.44}\text{Co}_{0.56}\text{P/NF}$ .

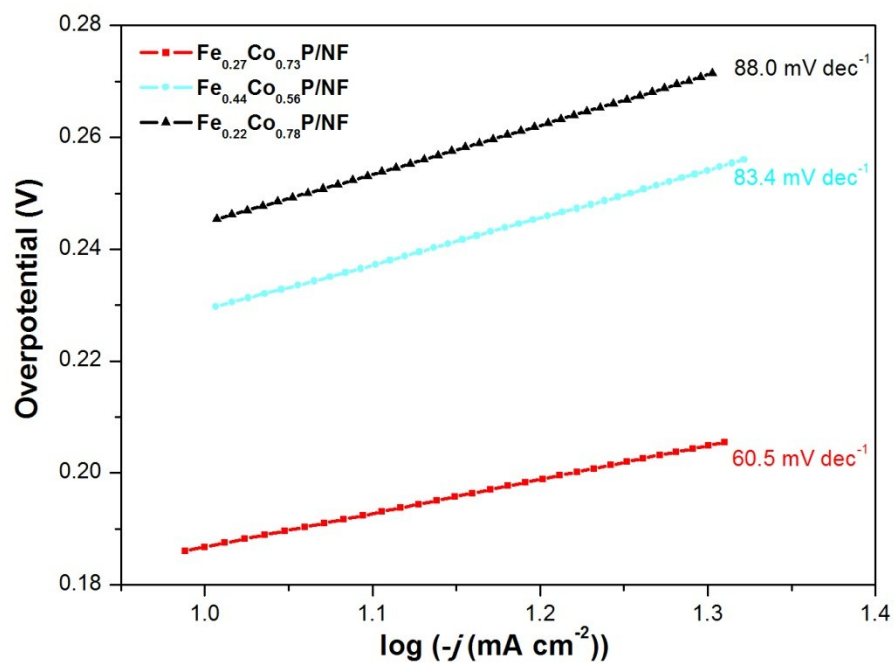

**Figure S13.** Tafel slopes of  $\text{Fe}_{0.27}\text{Co}_{0.73}\text{P/NF}$ ,  $\text{Fe}_{0.22}\text{Co}_{0.78}\text{P/NF}$  and  $\text{Fe}_{0.44}\text{Co}_{0.56}\text{P/NF}$ .



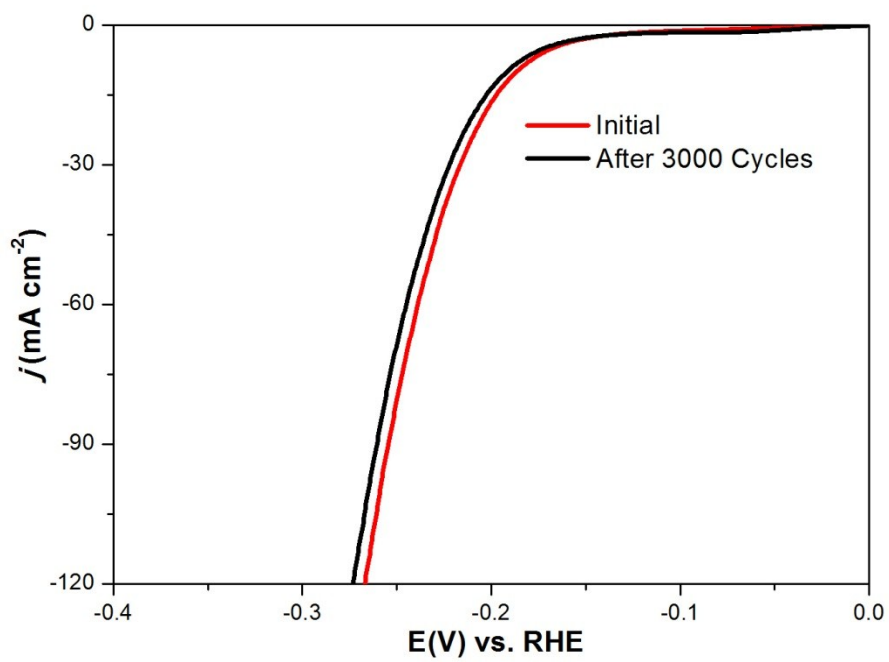

**Figure S14.** Polarization curves for  $\text{Fe}_{0.27}\text{Co}_{0.73}\text{P/NF}$  initial and after 3000 CV cycles.

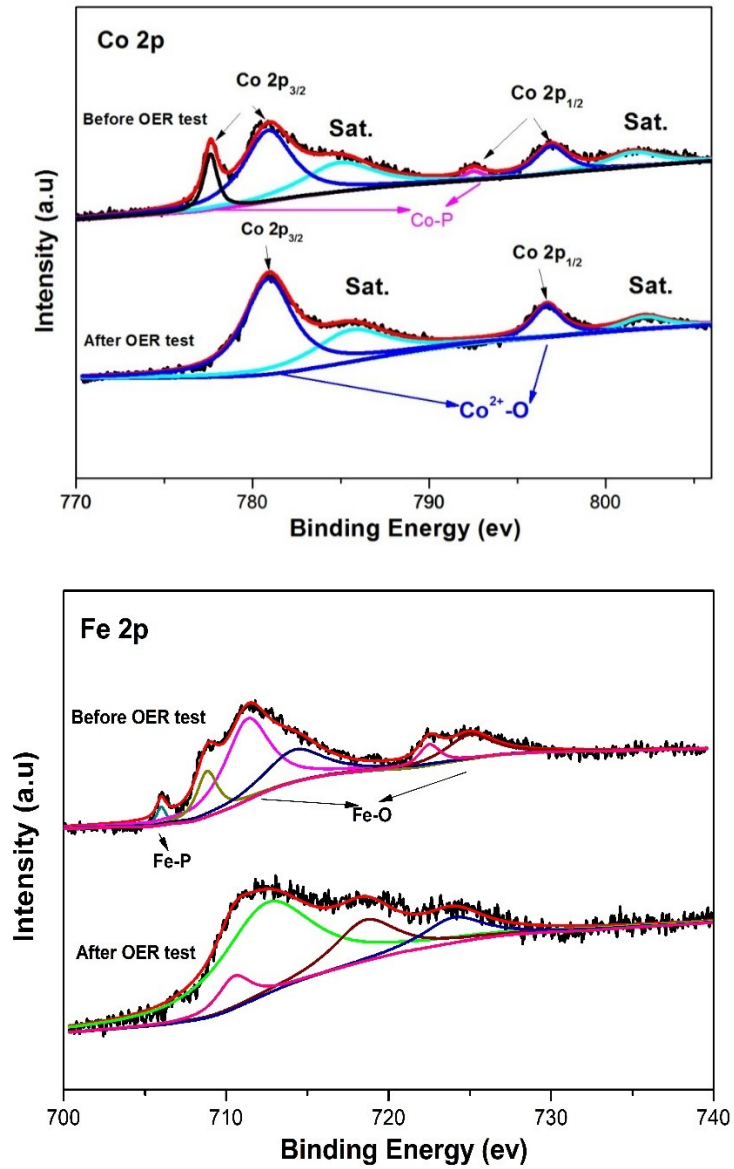

**Figure S15.** XPS spectrum of Fe<sub>0.27</sub>Co<sub>0.73</sub>P before and after OER test in Co 2p region and Fe 2p region.

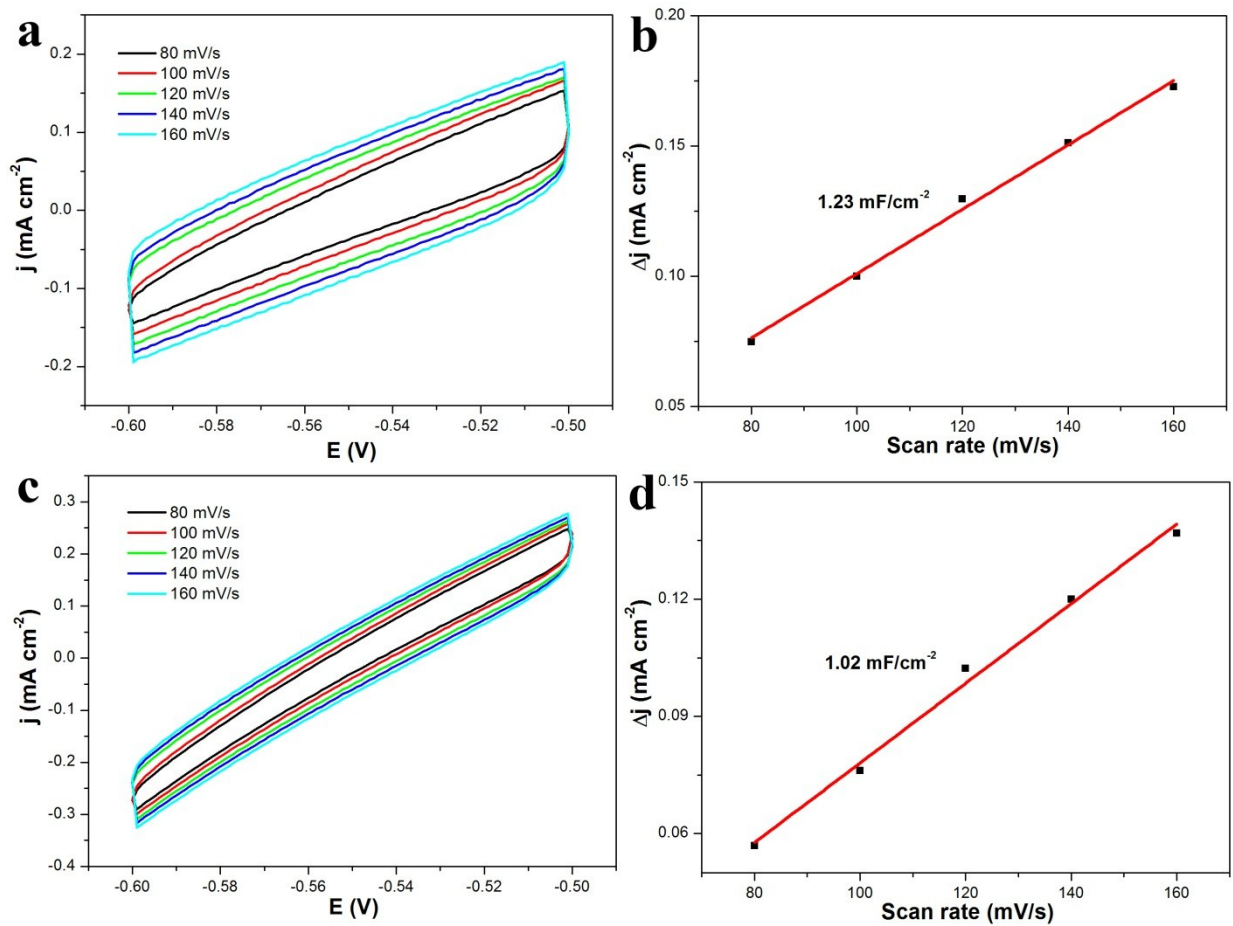

**Figure S16.** CVs of (a) CoP/NF and (c)  $\text{Fe}_{0.27}\text{Co}_{0.73}\text{P/NF}$  and corresponding current densities of (b) CoP/NF and (d)  $\text{Fe}_{0.27}\text{Co}_{0.73}\text{P/NF}$  plotted as a function of scan rate.

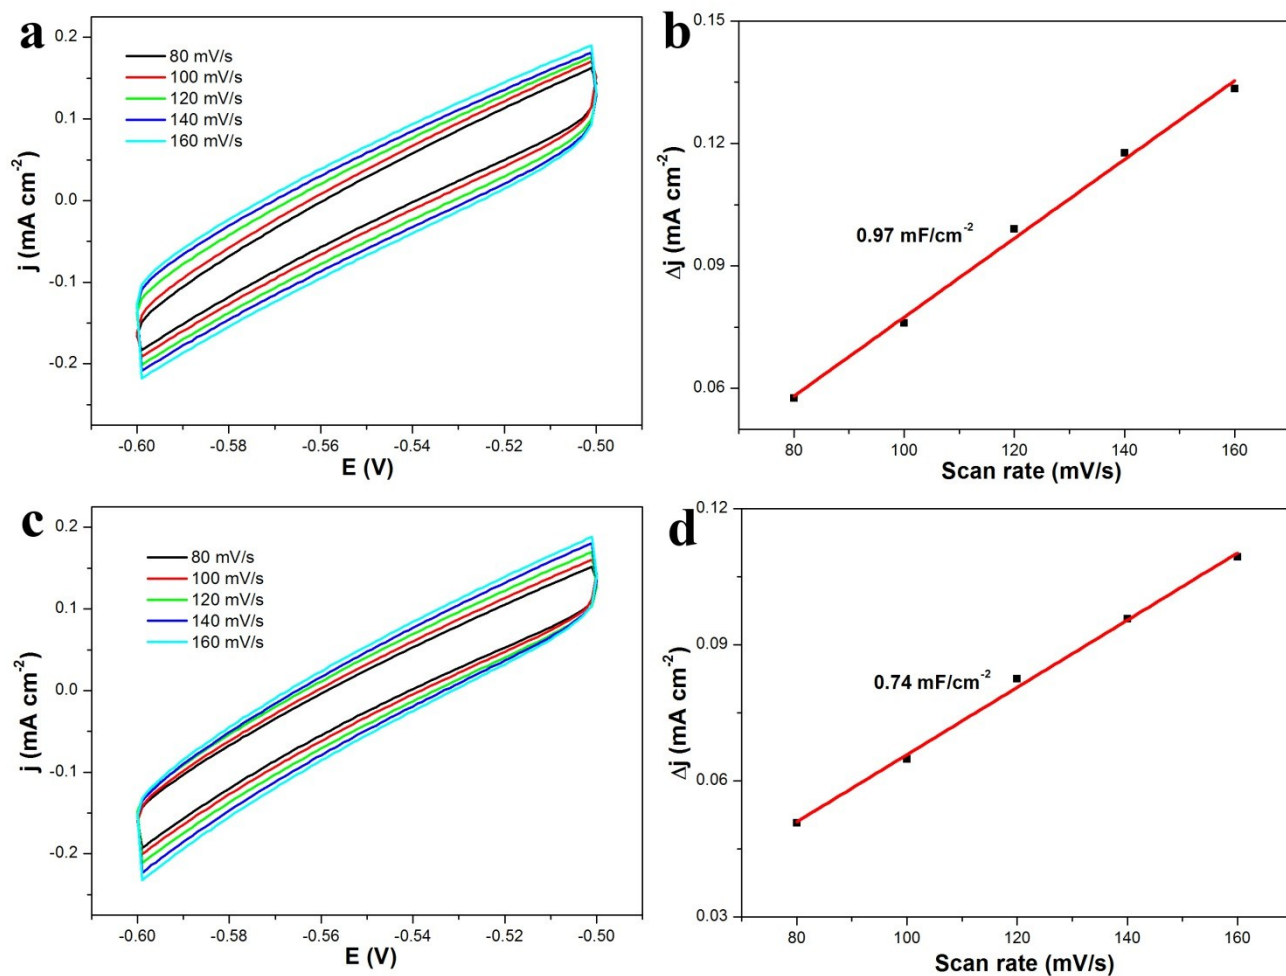

**Figure S17.** CVs of (a)  $\text{Fe}_{0.22}\text{Co}_{0.78}\text{P/NF}$  and (c)  $\text{Fe}_{0.44}\text{Co}_{0.56}\text{P/NF}$  and corresponding current densities of (b)  $\text{Fe}_{0.22}\text{Co}_{0.78}\text{P/NF}$  and (d)  $\text{Fe}_{0.44}\text{Co}_{0.56}\text{P/NF}$  plotted as a function of scan rate.

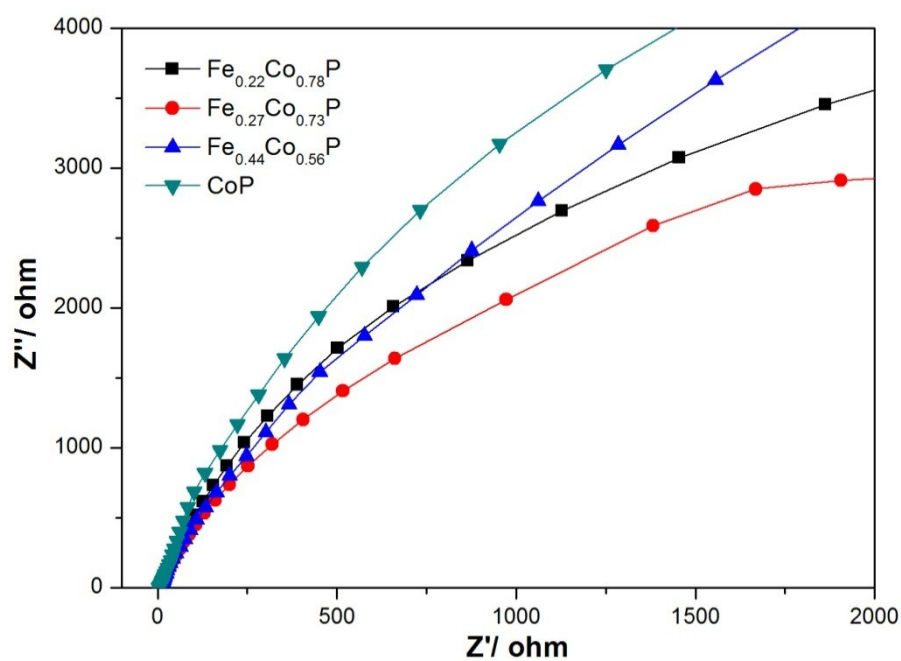

**Figure S18.** EIS spectra of  $\text{Fe}_{0.27}\text{Co}_{0.73}\text{P/NF}$ ,  $\text{Fe}_{0.22}\text{Co}_{0.78}\text{P/NF}$ ,  $\text{CoP/NF}$  and  $\text{Fe}_{0.44}\text{Co}_{0.56}\text{P/NF}$ .

**Table S1.** Comparison of OER performance in 1.0 M KOH for Fe<sub>0.27</sub>Co<sub>0.73</sub>P /NF with other recently reported representative OER electrocatalysts in alkaline solution.

| Electrocatalysts                                | Current density<br>(mA cm <sup>-2</sup> ) | Overpotential<br>(mV) | Reference                                   |
|-------------------------------------------------|-------------------------------------------|-----------------------|---------------------------------------------|
| Fe <sub>0.27</sub> Co <sub>0.73</sub> P/NF      | 10                                        | 251                   | This work                                   |
| CeOx/CoS                                        | 10                                        | 259                   | Angew. Chem. Int. Ed. 2019, 58, 139.        |
| NiCo LDH                                        | 20                                        | 393                   | Nano Lett. 2015, 15, 1421.                  |
| ZIF-67/LDH                                      | 10                                        | 340                   | J. Am. Chem. Soc. 2015, 137, 5590.          |
| ZIF-8/ZIF-67 core/shell structure               | 10                                        | 450                   | Adv. Mater. 2017, 29, 1700874.              |
| Ni <sub>1.85</sub> Fe <sub>0.15</sub> P NSAs/NF | 20                                        | 270                   | ACS Appl. Mater. Interfaces 2017, 9, 26001. |
| Ni <sub>3</sub> N/NF                            | 20                                        | 399                   | J. Mater. Chem. 2015, 3, 8171.              |

**Video S1.** Video of  $\text{Fe}_{0.27}\text{Co}_{0.73}\text{P}/\text{NF}$  electrodes electrolyze water in electrolyzed water reaction tank containing 1.0 M KOH alkaline solution.

**Video S2.** Video demonstration uses a drainage method to collect hydrogen and oxygen for characterizing the  $\text{Fe}_{0.27}\text{Co}_{0.73}\text{P}$  Faradaic efficiency.
